# Supplementary material for: Why India is struggling to feed their young children? A qualitative analysis for tribal communities
Source: HighWire-hosted journal article supplement (doi:10.1136/bmjopen-2021-051558), 2022-07-01
Supplement: bmjopen-2021-051558supp001_data_supplement.pdf [file bmjopen-2021-051558supp001_data_supplement.pdf]

## Supplementary Table

*Trends in IYCF indicators in India (in %)*

|                   | States            | Children receiving solid or semi-solid food and breast milk (%) |                         | Trends in IYCF (%) |
|-------------------|-------------------|-----------------------------------------------------------------|-------------------------|--------------------|
|                   |                   | NFHS 3<br>(2005 – 2006)                                         | NFHS 4<br>(2015 – 2016) |                    |
| <b>India</b>      |                   | 52.6                                                            | 42.7                    | -9.9               |
| <b>North</b>      | Rajasthan         | 38.7                                                            | 30.1                    | -8.6               |
|                   | Punjab            | 50.9                                                            | 41.1                    | -9.8               |
|                   | Uttar Pradesh     | 41.2                                                            | 32.6                    | -8.6               |
| <b>North East</b> | Sikkim            | 85.4                                                            | 61.8                    | -23.6              |
|                   | Manipur           | 77.4                                                            | 78.38                   | 1.4                |
|                   | Arunachal Pradesh | 80.2                                                            | 53.6                    | -26.6              |
| <b>West</b>       | Gujarat           | 54.1                                                            | 49.4                    | -4.7               |
|                   | Maharashtra       | 45.5                                                            | 43.3                    | -2.2               |
| <b>Central</b>    | Madhya Pradesh    | 46                                                              | 38.1                    | -7.9               |
|                   | Chhattisgarh      | 49                                                              | 53.8                    | 4.8                |
| <b>East</b>       | Bihar             | 54.5                                                            | 30.7                    | -23.8              |
|                   | Jharkhand         | 60.2                                                            | 47.2                    | -13                |
|                   | West Bengal       | 47.1                                                            | 52                      | 4.9                |
|                   | Odisha            | 65.4                                                            | 54.9                    | -10.5              |
| <b>South</b>      | Karnataka         | 69.7                                                            | 46                      | -23.7              |
|                   | Tamil Nadu        | 81.2                                                            | 67.5                    | -13.7              |
|                   | Kerala            | 93.9                                                            | 63.1                    | -30.8              |

Source: Dasgupta, Chaand and Rakshit (2018) [19]
